# Supplementary material for: Molecular Insight into Drug Resistance Mechanism Conferred by Aberrant PIK3CD Splice Variant in African American Prostate Cancer
Source: MDPI journal article supplement (doi:10.3390/cancers15041337), 2023-02-20
Supplement: s1 [file s1]

**Supplementary Table S1. Primer sequences for RT-PCR reaction to amplify *PIK3CD-L*, *PIK3CD-S*, and endogenous control *EIF1AX* transcripts.**

| Primer ID | Sequences of primer (5' to 3') |
|-----------|--------------------------------|
| PIK3CD-f  | CTGAGCTCTCAGAAGACC             |
| PIK3CD-r  | GCTCGCGGTTGATTCCAA             |
| EIF1AX-f  | GTAAGCTGAGAGGGGAGAGCA          |
| EIF1AX-r  | TGAAGCTGAGACAAGCAGGA           |

**Supplementary Table S2. Amino acid sequences for the catalytic domains of PI3K $\delta$ -L and PI3K $\delta$ -S isoforms.**

|                                                                                                                                                                                                                                                                                          |
|------------------------------------------------------------------------------------------------------------------------------------------------------------------------------------------------------------------------------------------------------------------------------------------|
| <b>Sequences for PI3K<math>\delta</math>-L catalytic domain (268 amino acid residues)</b>                                                                                                                                                                                                |
| VGIIFKNGDDL RQDMLTLQMIQLMDVLWKQEGLDLRMTPTGCLPTGDRTGLIEVVLRSDTIANIQLNKSNM<br>AATAAFNKDALLNWLKSKNPGEALDRAIEEFTLSCAGYCVATYVLGIGDRHSDNIMIRESGQLFHIDFGHF<br>LGNFKTKFGINRERVPFILTYDFVHVIQQGKTNNSEKFERFRGYCERAYTILRRHGLLFLHLFALMRAAGLP<br>ELSCSKDIQYLKDSLALGKTEEEALKHFRVKFNEALRESWKTKNWLAHNVSKD |

  

|                                                                                                                                                                                                                                |
|--------------------------------------------------------------------------------------------------------------------------------------------------------------------------------------------------------------------------------|
| <b>Sequences for PI3K<math>\delta</math>-S catalytic domain (212 amino acid residues)</b>                                                                                                                                      |
| VGIIFKNGDDL RQDMLTLQMIQLMDVLWKQEGLDLREALDRAIEEFTLSCAGYCVATYVLGIGDRHSDNIM<br>IRESGQLFHIDFGHF LGNFKTKFGINRERVPFILTYDFVHVIQQGKTNNSEKFERFRGYCERAYTILRRHGL<br>LFLHLFALMRAAGLP ELSCSKDIQYLKDSLALGKTEEEALKHFRVKFNEALRESWKTKNWLAHNVSKD |

**Supplementary Table S3. Primer sequences for RT-PCR reactions followed by the RNA-IP (RIP) assays. The primers were designed to verify whether SRSF2 or HNRNPF binds to the synthesized RNA fragment containing putative binding motifs.**

| <b>Primer ID</b> | <b>Sequences of primer (5' to 3')</b> |
|------------------|---------------------------------------|
| PIK3CD-IN19-f    | GCCCATCTTGGGAAGCAGTGG                 |
| PIK3CD-IN19-r    | CTTGGAAGAGAACCAGACAGA                 |

**Supplementary Table S4. IC<sub>50</sub> values for the PCa cell lines under treatment of Idelalisib, Seletalisib, Wortmannin, and Dactolisib.** The IC<sub>50</sub> values were determined based on the dose-response curves presented in Figure 2A.

| PCa cell line | IC <sub>50</sub> (μM) |             |            |            |
|---------------|-----------------------|-------------|------------|------------|
|               | Idelalisib            | Seletalisib | Wortmannin | Dactolisib |
| 22Rv1         | 1.1                   | 15.7        | 36.2       | 9.2        |
| LNCaP         | 8.2                   | 3.7         | 0.4        | 0.2        |
| PC-3          | 80.2                  | 85.5        | 46.5       | 0.2        |
| RC77 T/E      | 17.2                  | 176.7       | 121.3      | 16.4       |
| MDA PCa 2b    | 132.2                 | 53.1        | 1.4        | 35.9       |

**Supplementary Table S5. Differentially expressed splicing factors identified from microarray profiling data in AA PCa vs. EA PCa specimens.** RNA samples purified from 20 AA PCa and 15 EA PCa were subjected to exon array analysis, and the mRNA level data identified six splicing factors were upregulated in AA PCA vs. EA PCa. The transcript cluster IDs, gene symbols, RefSeq IDs, ratios, fold changes, and regulation directions were listed.

| <b>Transcript Cluster ID</b> | <b>Gene Symbol</b> | <b>RefSeq</b> | <b>Ratio (AA vs. EA PCa)</b> | <b>Fold-Change (AA vs. EA PCa)</b> | <b>Regulation</b>   | <b>Enriched/depleted mRNAs</b> |
|------------------------------|--------------------|---------------|------------------------------|------------------------------------|---------------------|--------------------------------|
| 3771800                      | SRSF2              | NM_003016     | 1.74536                      | 1.74536                            | AA PCa up vs EA PCa | AA-enriched                    |
| 2548970                      | SRSF7              | NM_001031684  | 1.87885                      | 1.87885                            | AA PCa up vs EA PCa | AA-enriched                    |
| 3286286                      | HNRNPF             | NM_004966     | 1.89991                      | 1.89991                            | AA PCa up vs EA PCa | AA-enriched                    |
| 2401275                      | HNRNPR             | NM_001102398  | 1.77853                      | 1.77853                            | AA PCa up vs EA PCa | AA-enriched                    |
| 2694617                      | ISY1               | NM_020701     | 1.74069                      | 1.74069                            | AA PCa up vs EA PCa | AA-enriched                    |
| 2544179                      | SF3B14             | NM_016047     | 1.72692                      | 1.72692                            | AA PCa up vs EA PCa | AA-enriched                    |

**Supplementary Table S6. Putative binding motifs of SRSF2 and HNRNPF located at intron 19 of *PIK3CD* pre-mRNA. The sequence analysis and binding motif prediction were performed using SFmap program (<http://sfmap.technion.ac.il/index.html>). The two SRSF2 motifs (sequence positions at 285 and 269) and 1 HNRNP motif (sequence position at 268) that show top scores significantly higher than their cutoffs were selected for the RNA pulldown and RIP/RT-PCR assays in this study.**

**Splicing Factor: SRSF2 (SC35), Motif: gryymcyr, Cutoff: 0.600**

| Sequence Position | Genomic Coordinate | K-mer           | Score        |
|-------------------|--------------------|-----------------|--------------|
| 6                 | chr1:9782670       | gacccccca       | 0.681        |
| <b>285</b>        | chr1:9782949       | <b>ggccucug</b> | <b>0.706</b> |

**Splicing Factor: SRSF2 (SC35), Motif: ugcygyy, Cutoff: 0.586**

| Sequence Position | Genomic Coordinate | K-mer          | Score        |
|-------------------|--------------------|----------------|--------------|
| 57                | chr1:9782721       | ugccccu        | 0.656        |
| 184               | chr1:9782848       | ugcuccu        | 0.602        |
| 214               | chr1:9782878       | uguugcu        | 0.662        |
| 234               | chr1:9782898       | ugccccu        | 0.695        |
| <b>269</b>        | chr1:9782933       | <b>uggcguc</b> | <b>0.695</b> |
| 389               | chr1:9783053       | ugcuuuu        | 0.626        |
| 485               | chr1:9783149       | ugccauu        | 0.687        |

**Splicing Factor: HNRNPF, Motif: gukgykg, Cutoff: 0.586**

| Sequence Position | Genomic Coordinate | K-mer          | Score        |
|-------------------|--------------------|----------------|--------------|
| 31                | chr1:9782695       | gugucug        | 0.653        |
| 73                | chr1:9782737       | cuuguug        | 0.597        |
| 76                | chr1:9782740       | guugaag        | 0.597        |
| <b>268</b>        | chr1:9782932       | <b>guggcgu</b> | <b>0.672</b> |

**Splicing Factor: hnRNPF, Motif: gggug, Cutoff: 0.700**

| Sequence Position | Genomic Coordinate | K-mer | Score |
|-------------------|--------------------|-------|-------|
| 81                | chr1:9782745       | aggug | 0.737 |
