# Supplementary material for: Molecular Insight into Drug Resistance Mechanism Conferred by Aberrant PIK3CD Splice Variant in African American Prostate Cancer
Source: MDPI journal article supplement (doi:10.3390/cancers15041337), 2023-02-20
Supplement: s1 [file s1]

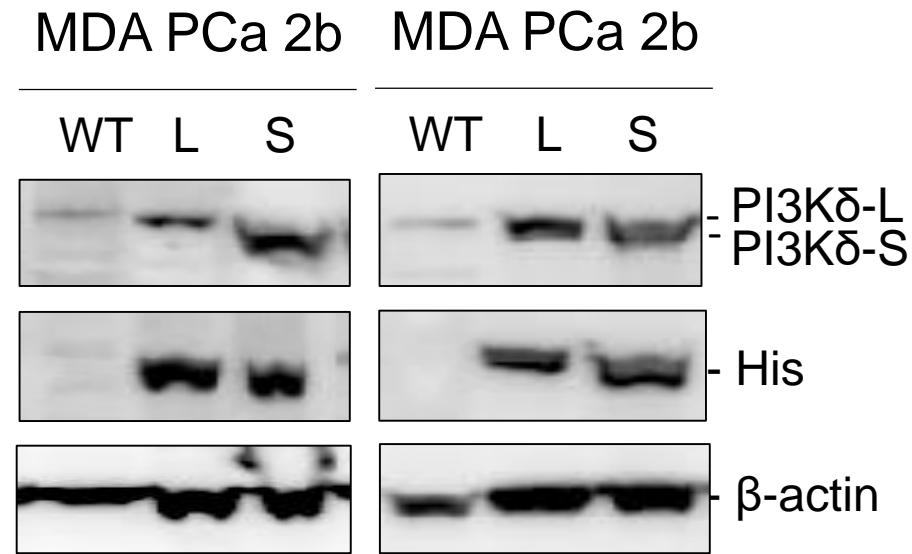

**Supplementary Figure S1. Western blot analysis to examine the expression levels of His-tagged PI3Kδ-L and PI3Kδ-S in MDA PCa 2b cells.** Two sets of representative MDA PCa 2b wild-type (WT), MDA PCA 2b stably expressing *PIK3CD-L* (L), and MDA PCA 2b stably expressing *PIK3CD-S* (S) cells were harvested, lysed using M-PER lysis buffer for preparation of protein lysates. The cell lysates were subjected to western blot analysis, and the His-tagged PI3Kδ-L and PI3Kδ-S levels were detected using monoclonal mouse antibody against PI3Kδ and monoclonal rabbit antibody against His tag. β-actin was used as an endogenous protein control.

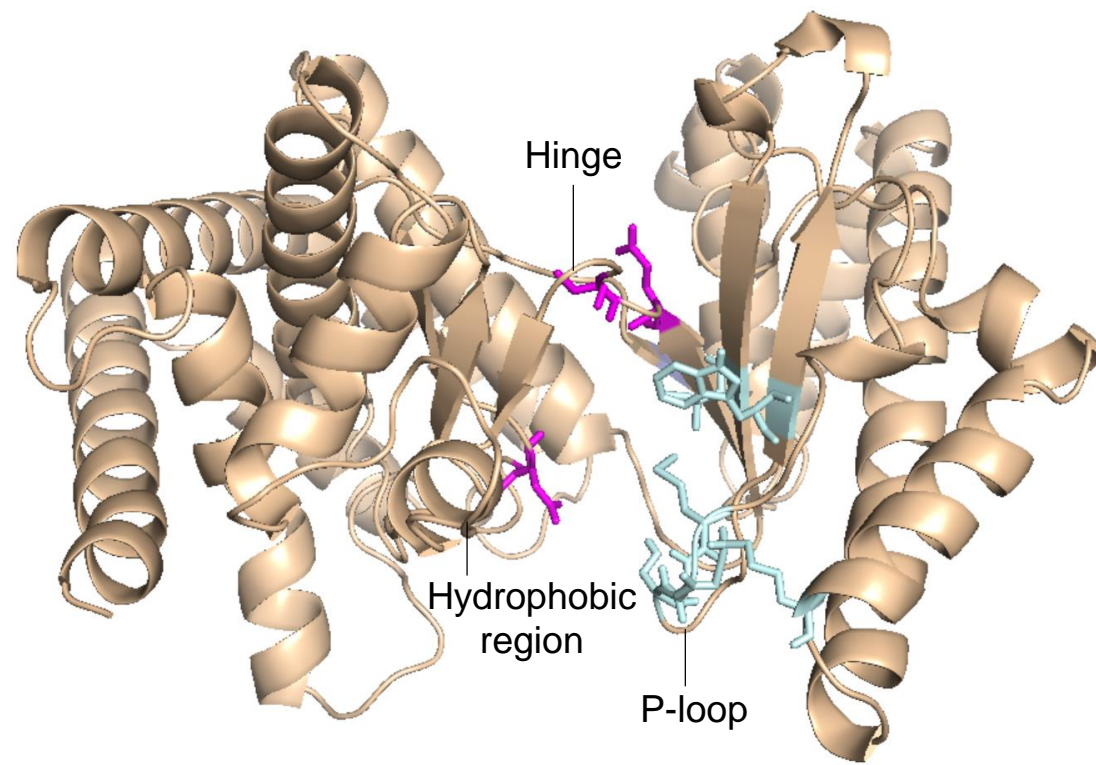

**PI3K $\delta$ -L**

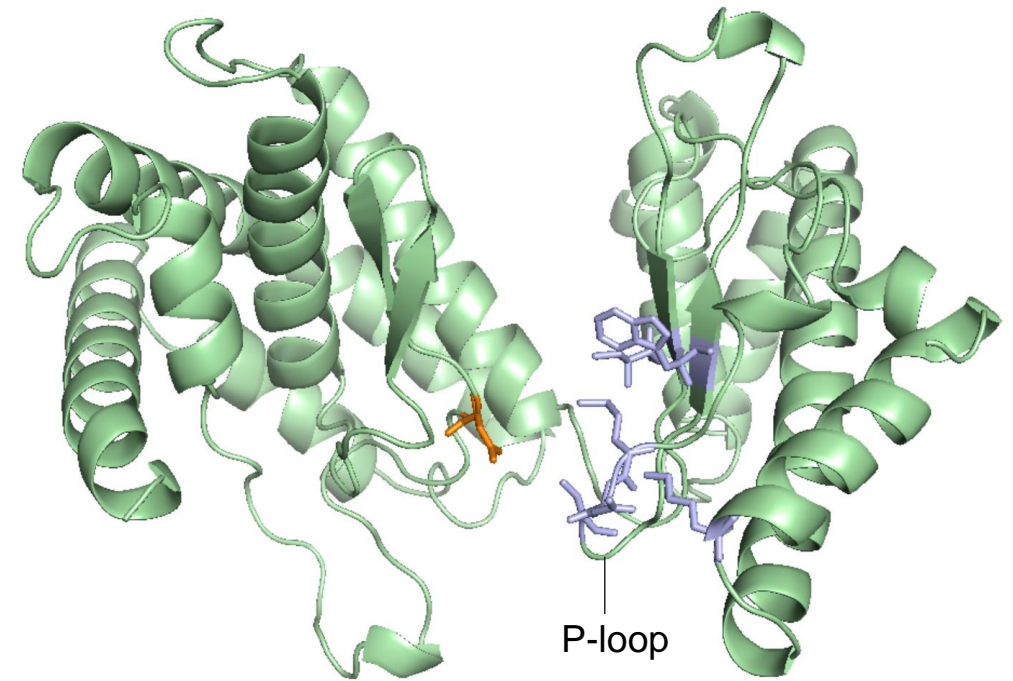

**PI3K $\delta$ -S**

**Supplementary Figure S2. 3D structures of PI3K $\delta$ -L and PI3K $\delta$ -S catalytic domains.** Molecular modeling shows that PI3K $\delta$ -L and PI3K $\delta$ -S have nearly identical 3D conformations except that hinge and majority of hydrophobic region are missing in PI3K $\delta$ -S. P-loop and the all ATP binding residues (K708, M752, D753, S754, W760, and I777, indicated as blue and purple in PI3K $\delta$ -L and PI3K $\delta$ -S) are preserved in both PI3K $\delta$ -L and PI3K $\delta$ -S. However, drug binding sites resided at hinge (E826 and V828, pink residues located at hinge of PI3K $\delta$ -L) are missing in PI3K $\delta$ -S, and only one residue Ile (orange residue) is preserved in PI3K $\delta$ -S isoform.

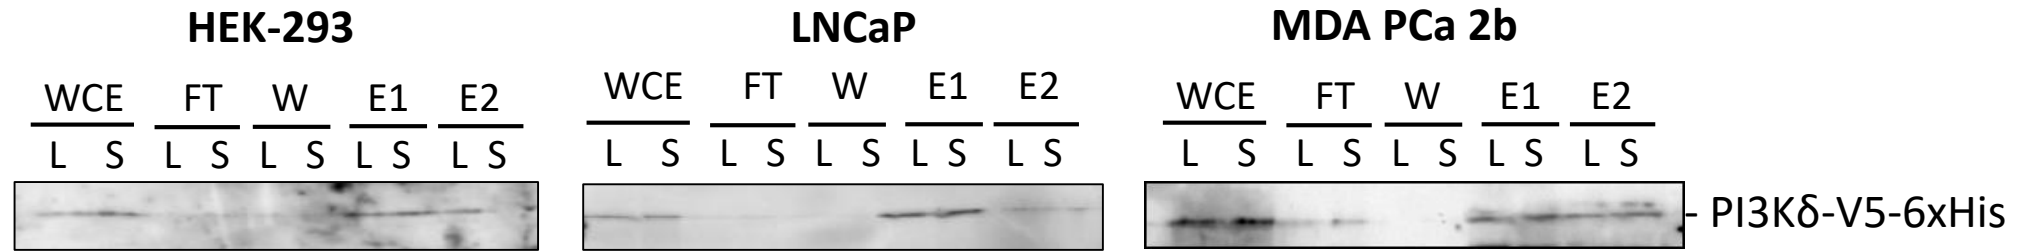

**Supplementary Figure S3. Purification of PI3Kδ-L and PI3Kδ-S from HEK293, LNCaP, and MDA PCa 2b cells.** The HEK293, LNCaP and MDA PCa 2b expressing *PIK3CD-L* and *PIK3CD-S* were harvested, lysed for preparation of cell lysates. The His-tagged PI3Kδ-L and PI3Kδ-S isoforms were purified from the collected cell lysates using Ni-NTA spin columns. The whole cell extract (WCE), flow-through (FT), wash (W), and eluted (E1 and E2) samples were subjected to western blot analysis. Monoclonal mouse PI3Kδ antibody was used to detect the His-tagged PI3Kδ-L and PI3Kδ-S isoforms.

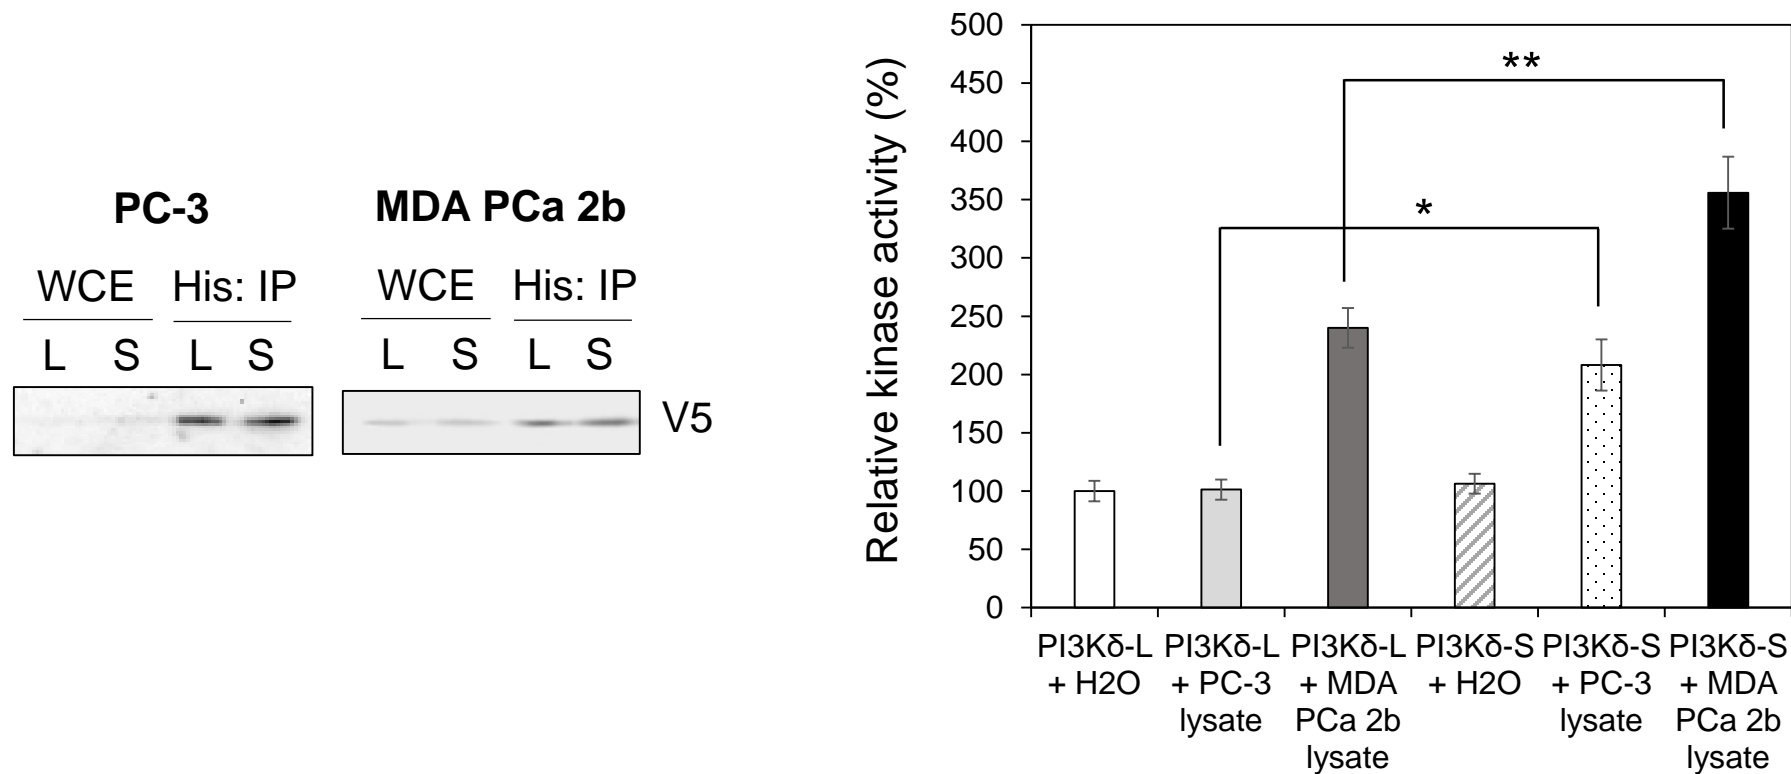

**Supplementary Figure S4. Cell-free kinase activity assays of PI3Kδ-L and PI3Kδ-S isoforms. (A)** PI3Kδ-L and PI3Kδ-S isoforms were purified by immunoprecipitation (IP) of *PIK3CD-L-V5-6×HIS* (L) and *PIK3CD-S-V5-6×HIS* (S) expressing PC-3 and MDA PCa 2b lysates using anti-His antibody and protein A/G beads. Western blot using anti-V5 antibody confirmed that PI3Kδ-L-V5-6×His and PI3Kδ-S-V5-6×His were purified. **(B)** PI3 kinase activities of purified PI3Kδ-L and PI3Kδ-S (mixed with H<sub>2</sub>O, PC-3 cell lysate, or MDA PCa 2b cell lysate) were measured. Kinase activity of PI3Kδ-L mixed with H<sub>2</sub>O was defined as 100% for normalization. \**p* < 0.05 and \*\**p* < 0.05, significant different kinase activities in PI3Kδ-S vs. PI3Kδ-L in presence of PC-3 lysates and MDA PCa 2b lysates, respectively. Data values represent mean ± SD, from 3-4 independent experiments.

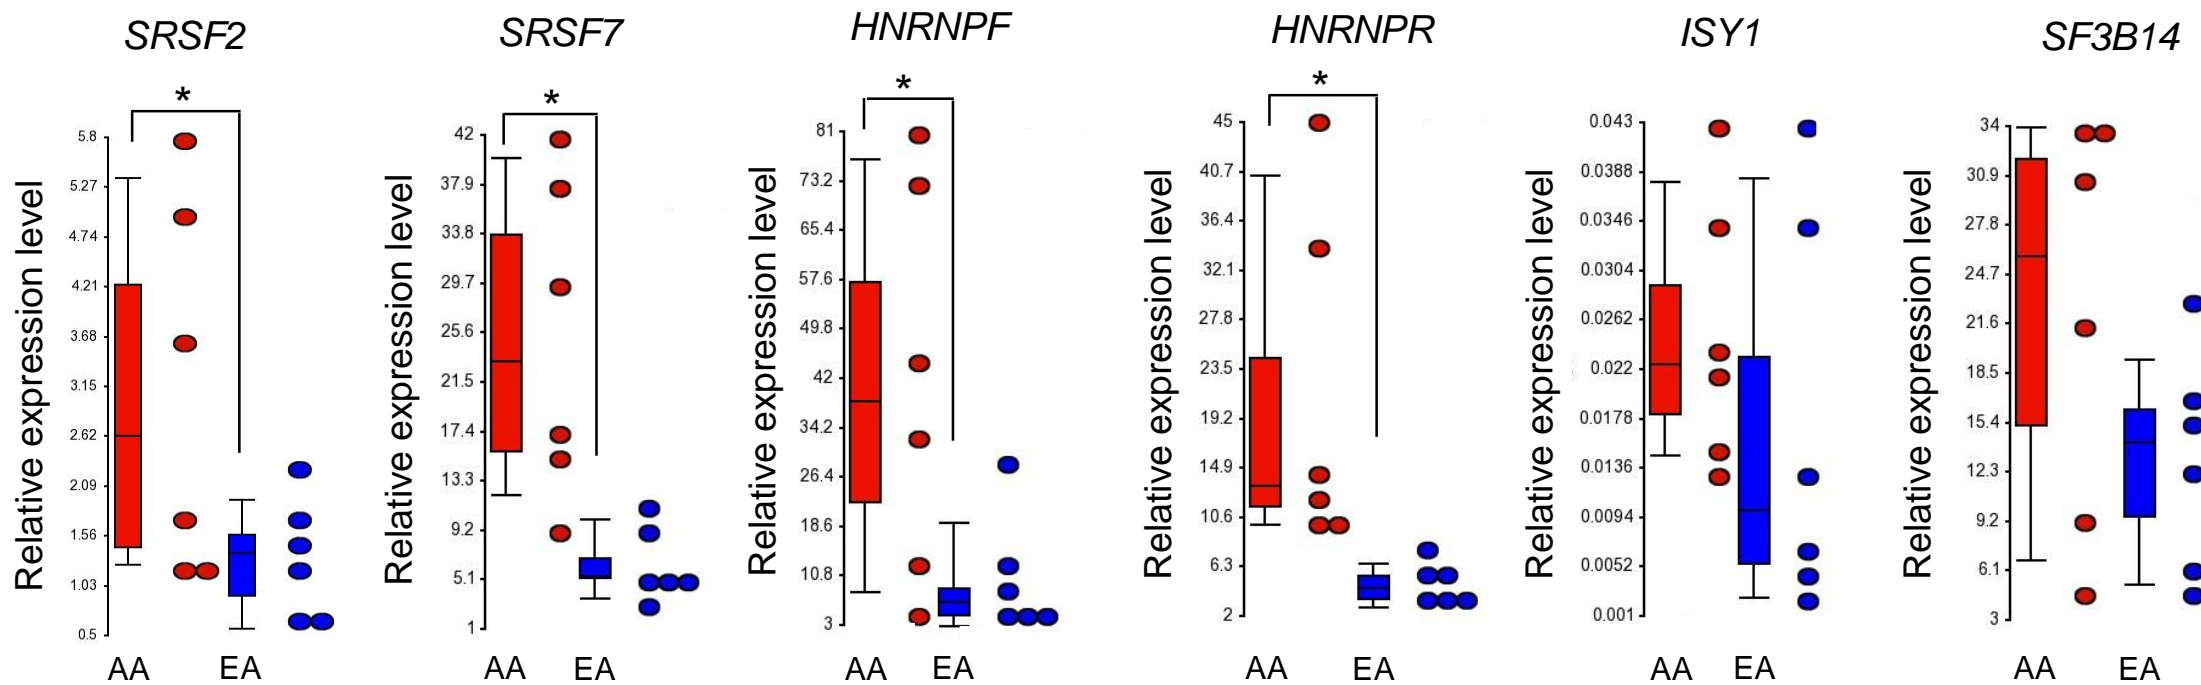

**Supplementary Figure S5. RT-qPCR validation of *SRSF2*, *SRSF7*, *HNRNPF*, *HNRNPR*, *ISY1* and *SF3B14* expression levels.** RNA samples purified from 6 AA and 6 EA PCa patient samples were used for RT-qPCR assays to examining the gene expression levels of the six splicing factors identified differentially expressed from microarray data. \* $p < 0.05$ , significant different expression levels in AA PCa vs. EA PCa, based on two-tailed student t-test analysis.



**A****EA**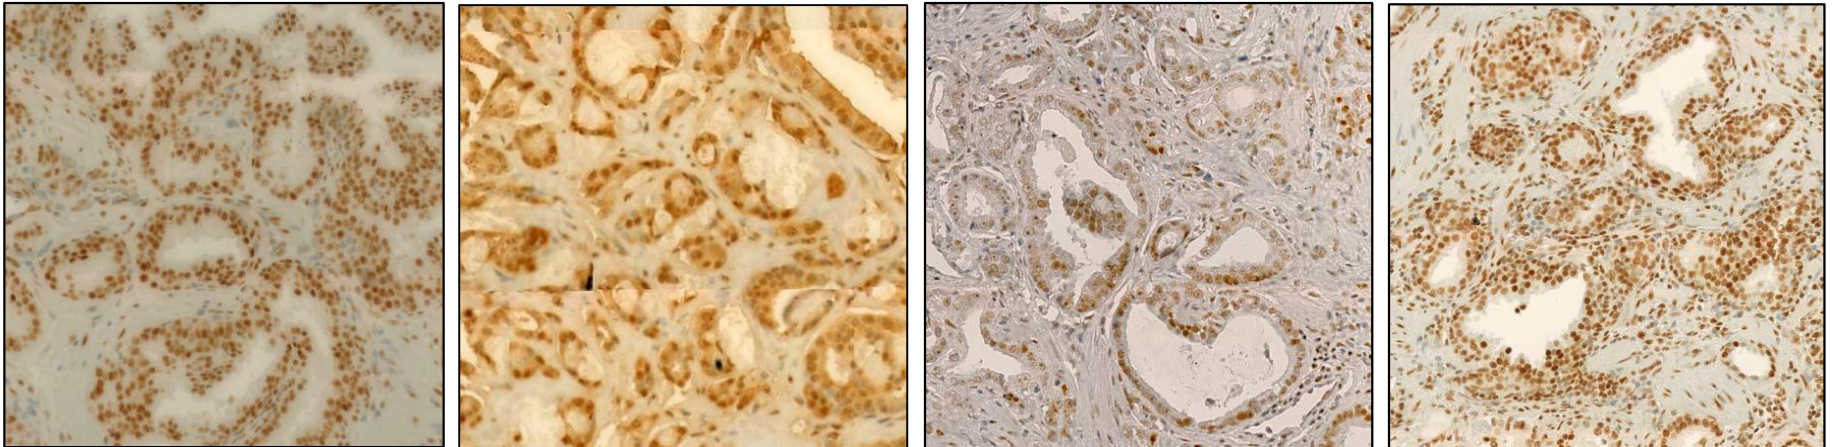**AA**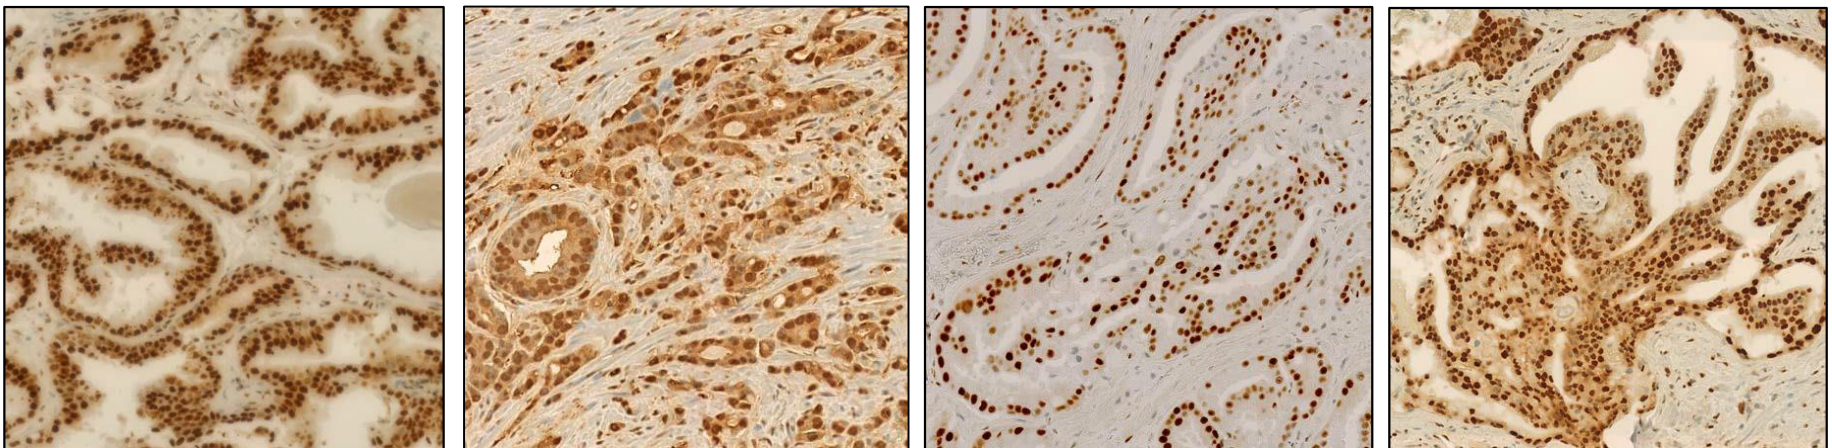**SFSR2****SFSR7****HNRNPF****HNRNPR****B**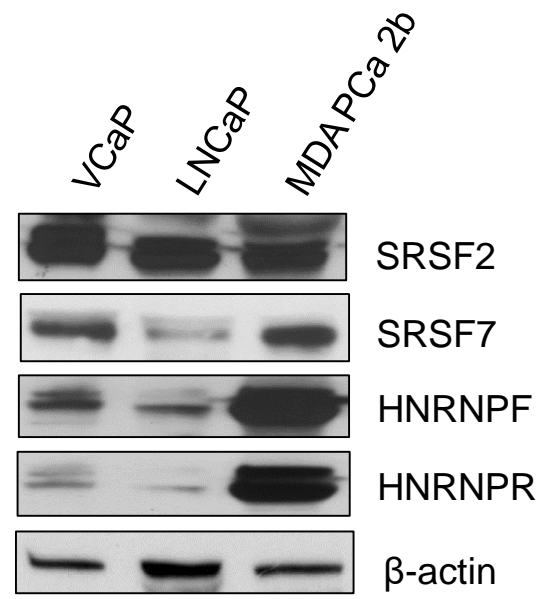

**Supplementary Figure S6. IHC and western blot assays to verify protein expression levels of SRSF2, SRSF7, HNRNPF, and HNRNPR in AA and EA PCa. (A)** Representative IHC staining images of the SRSF2, SRSF7, HNRNPF, and HNRNPR levels in AA PCa vs. EA PCa. **(B)** Western blot analysis of SRSF2, SRSF7, HNRNPF, and HNRNPR levels in EA PCa (VCaP and LNCaP) vs. AA PCa (MDA PCa 2b) cells. β-actin was served as endogenous protein control for western blot analysis.
